# Supplementary material for: ORP4L is essential for T-cell acute lymphoblastic leukemia cell survival
Source: PubMed Central journal article supplement (PMC5025801; doi:10.1038/ncomms12702), 2016-09-01
Supplement: ncomms12702-s1.pdf [file ncomms12702-s1.pdf]

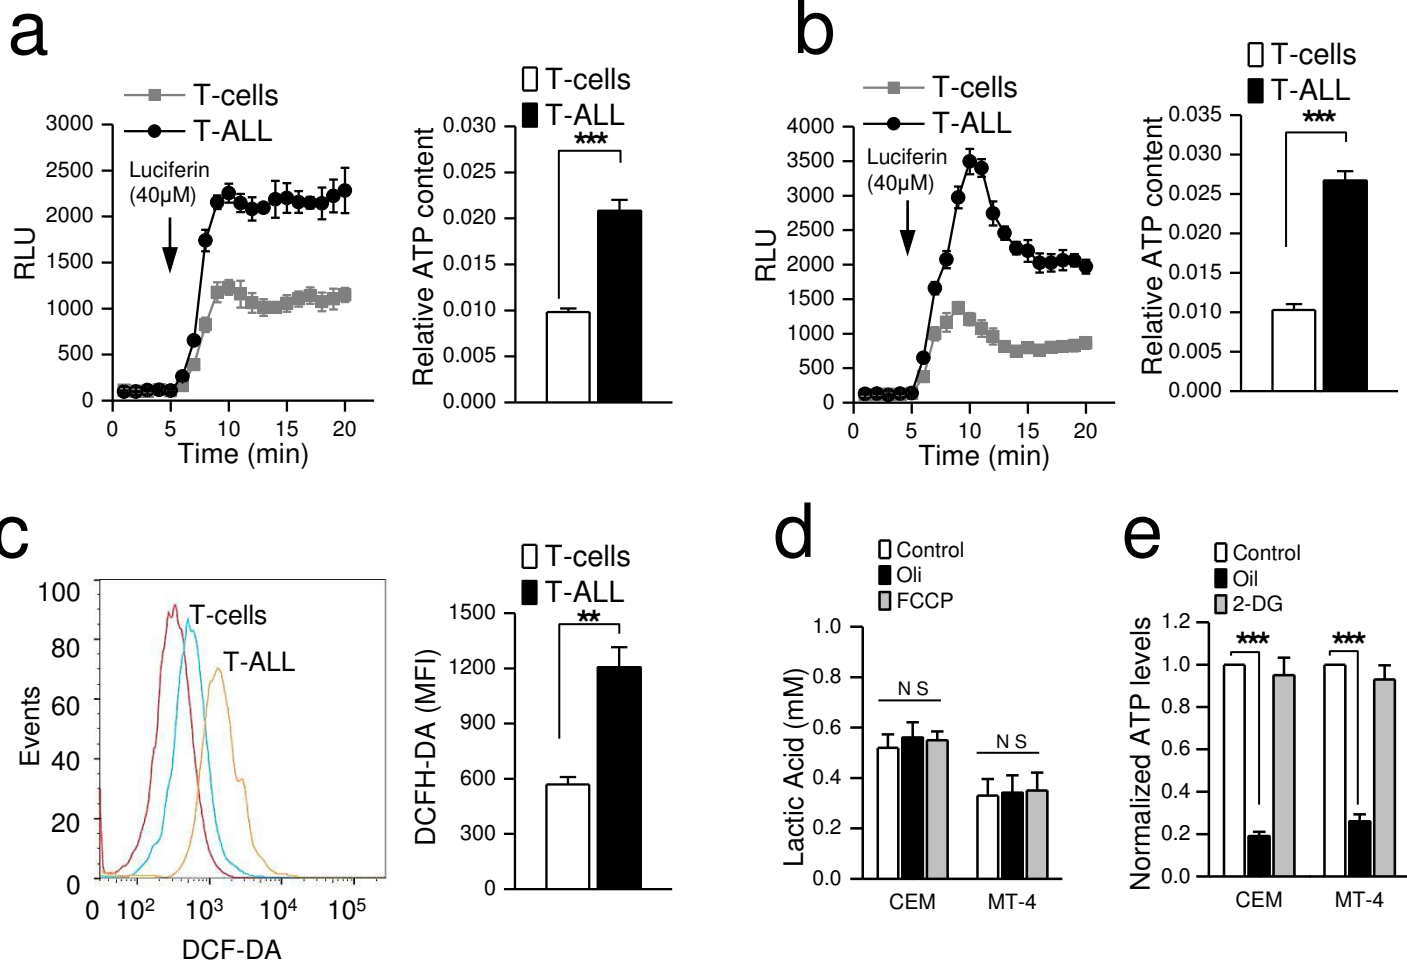

**Supplementary Figure 1. Increased mitochondrial metabolism in T-ALL cells.** (a, b), mitochondrial (a) and cytosolic (b) ATP were measured in normal T-cells and primary T-ALL cells transfected with mitochondrial luciferase (PcDNA3-COX8-luc) or cytosolic (PcDNA3lucLL/V) luciferase. Representative luciferase luminescence curves as a function of time and quantification of the luminescence as a measure of ATP content in normal T-cells (n=3) and primary T-ALL cells (n=4) are shown. (c) A representative histogram of a FACS-analysis showing normal T-cells and primary T-ALL cells stained with a ROS-sensitive dye (DCFH-DA) and an unstained control. An overview of the DCFH-DA fluorescence intensity (MFI) in normal T-cells (n=3) and primary T-ALL cells (n=4) are shown. (d) Lactic acid levels in CEM and MT-4 cells after treatment with the oxidative phosphorylation inhibitor oligomycin (Oli, 5  $\mu$ M) or FCCP (5  $\mu$ M) for 4 h. (e) ATP levels were measured in CEM and MT-4 cells after treatment with oligomycin (Oli, 5  $\mu$ M) or the glycolysis inhibitor 2-DG, (5  $\mu$ M) for 6 h. The data represent mean  $\pm$  S.D. value from an experiment performed in triplicate. \*\*p < 0.01, \*\*\*p < 0.001, NS, not significant, Student's t test.

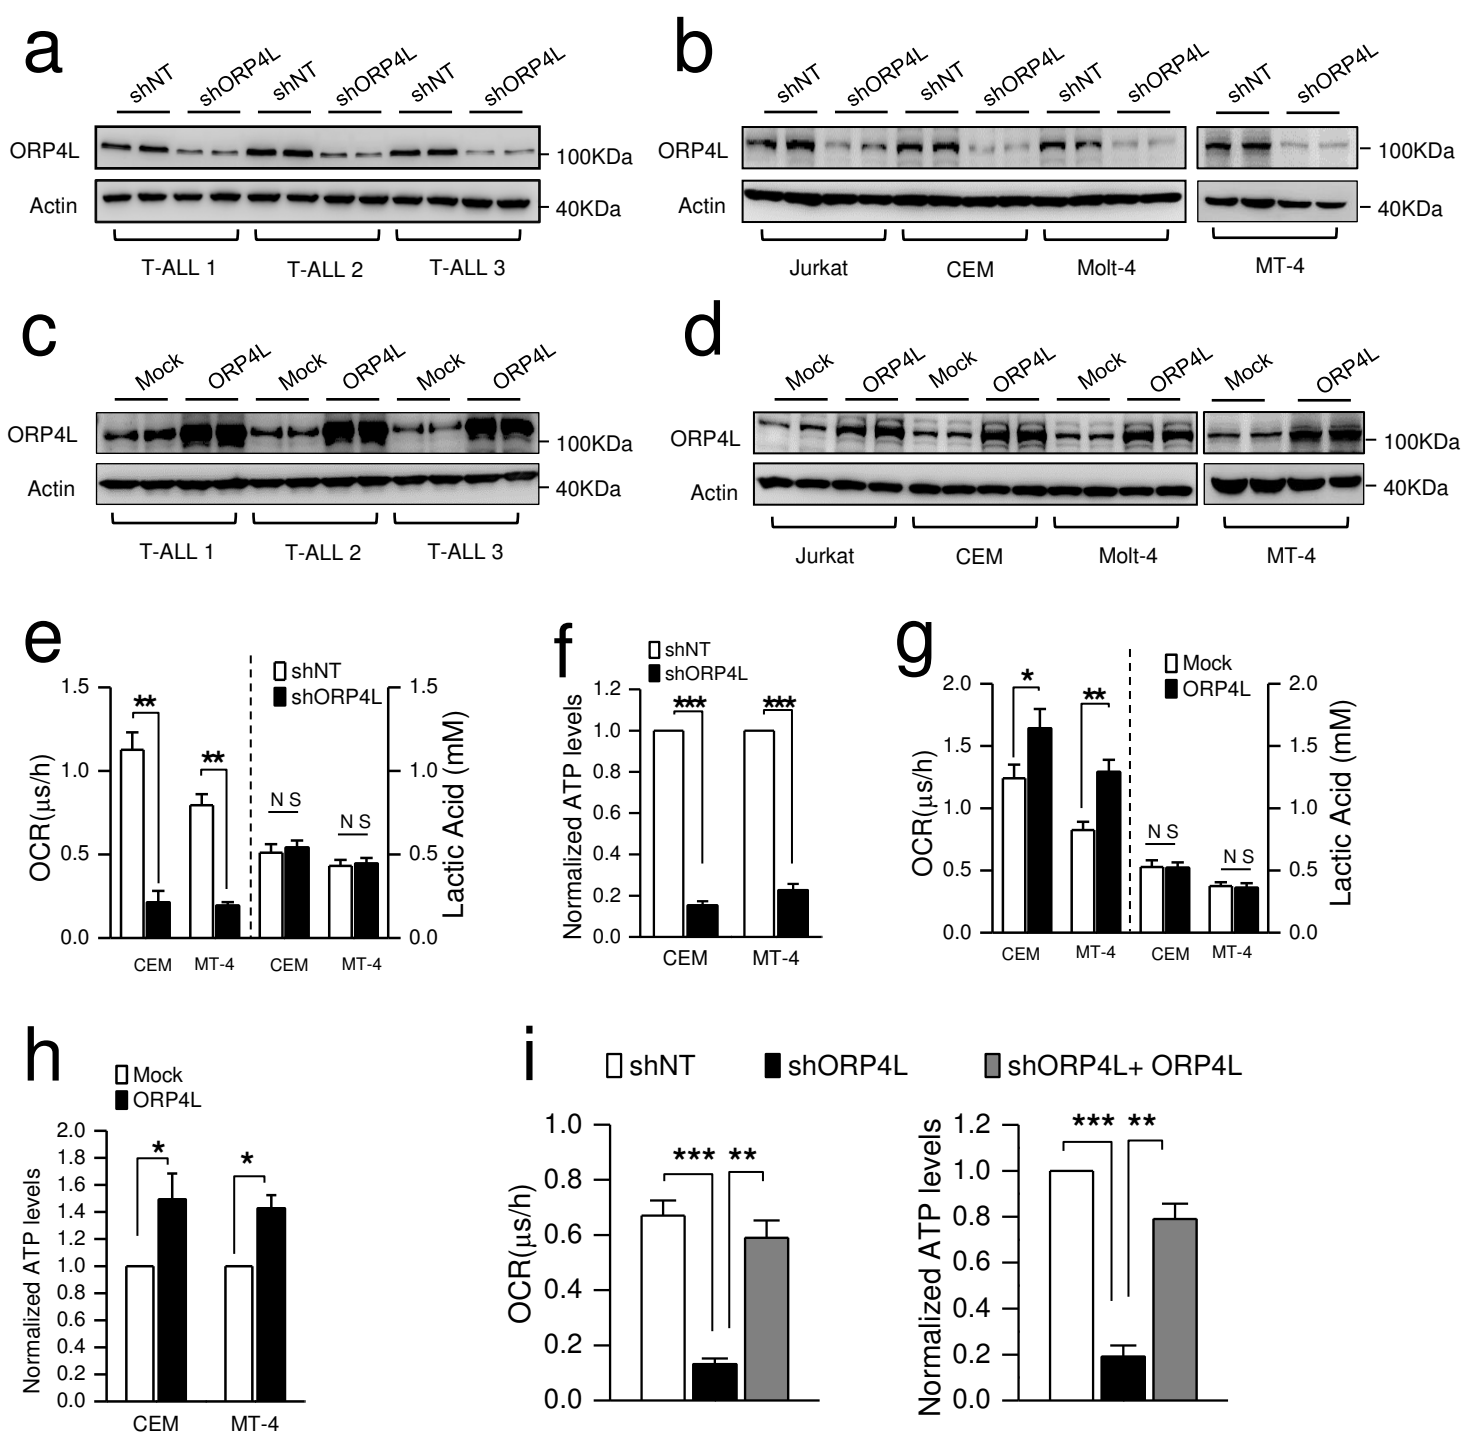

### Supplementary Figure 2. Western blot analysis of ORP4L expression and the role of

**ORP4L in mitochondrial metabolism of T-ALL cells. (a, b)** Western blot analysis of ORP4L knockdown efficiency in primary T-ALL cells (a) and T-ALL cell lines (b). **(c, d)** Western blot analysis of ORP4L overexpression in primary T-ALL cells (c) and T-ALL cell lines (d).

**(e)** Baseline OCR and lactic acid levels in CEM and MT-4 cells with ORP4L knockdown. **(f)** ATP levels in CEM and MT-4 cells with ORP4L knockdown. **(g)** Baseline OCR and lactic acid levels in CEM and MT-4 cells with ORP4L overexpression. **(h)** ATP levels in CEM and MT-4 cells with ORP4L overexpression. **(i)** Baseline OCR (left) and ATP levels (right) in shNT or shORP4L lentivirus-infected Jurkat T-cells and shORP4L-

infected cells re-transfected with ORP4L. The data represent mean  $\pm$  S.D. from an experiment performed in triplicate. \* $p < 0.05$ , \*\* $p < 0.01$ , \*\*\* $p < 0.001$ , NS, not significant, Student's t test.

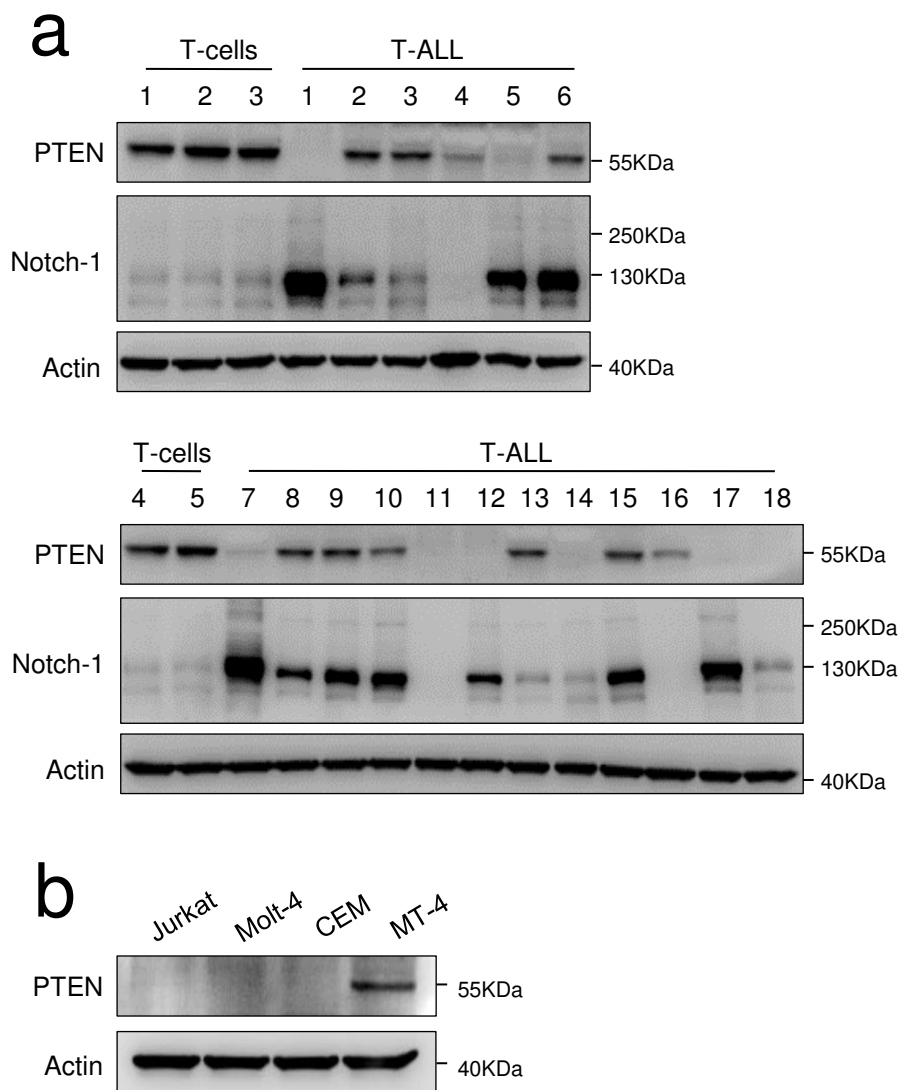

**Supplementary Figure 3. Western blot analysis of PTEN and Notch-1 status in normal T-cells and primary T-ALL cells (a), and of PTEN status in the T-ALL cell lines used (b).**

**a**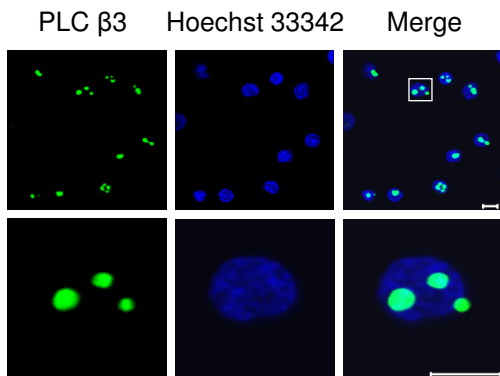**b**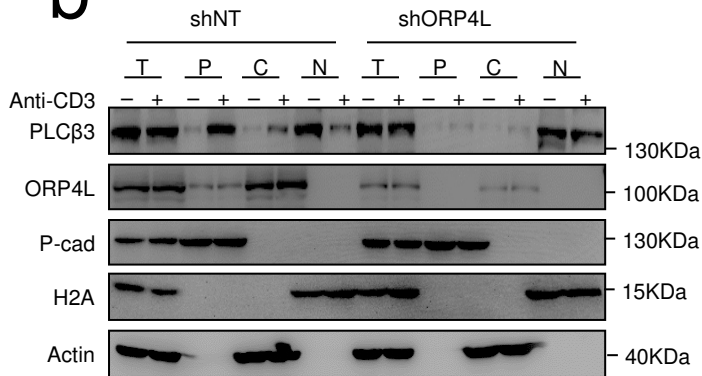**c**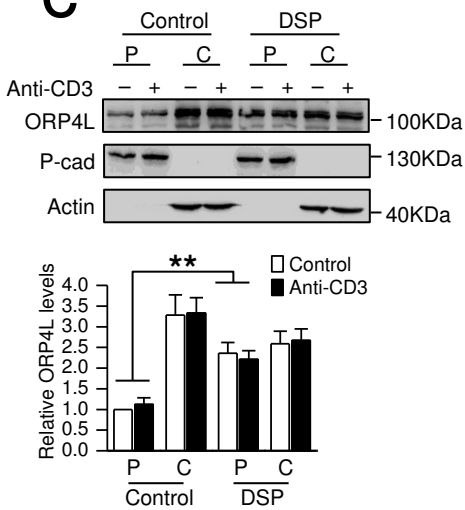**d**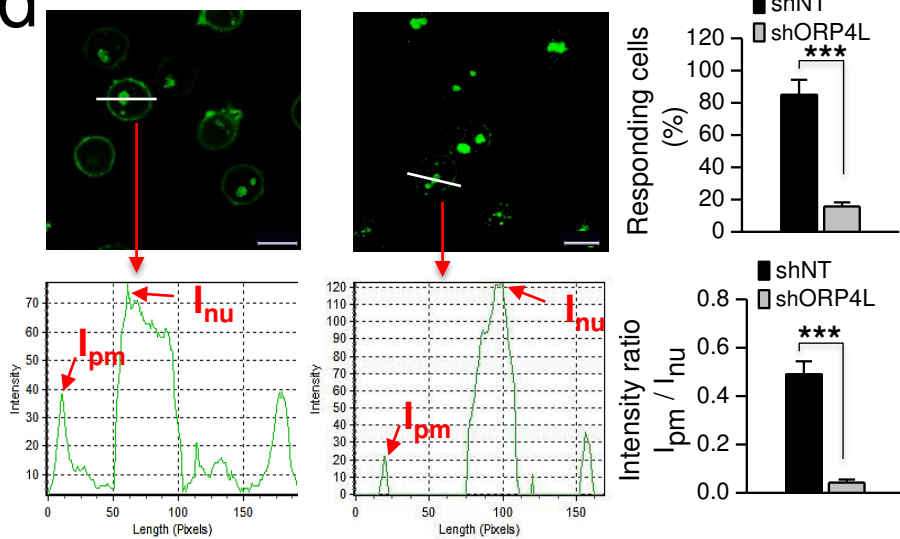**e**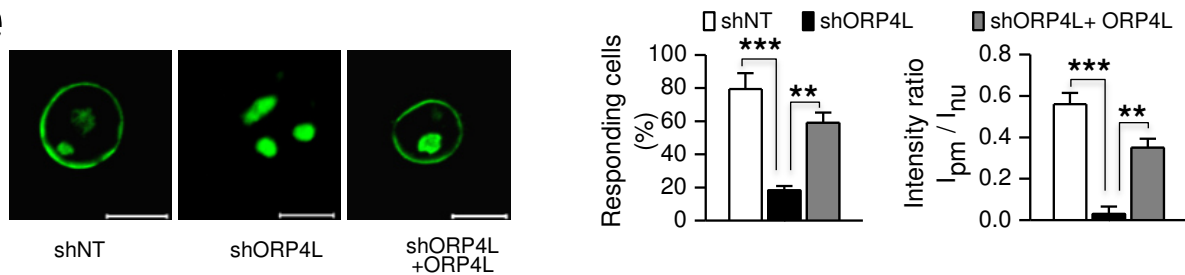**f**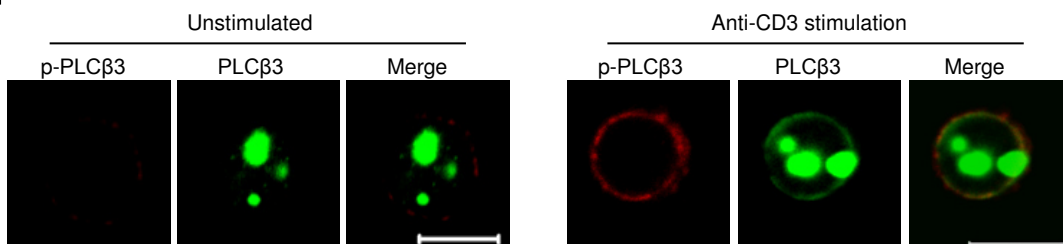

**Supplementary Figure 4. ORP4L knockdown prevents PLC $\beta$ 3 translocation to the plasma membrane and activation.** (a) Immunofluorescence staining with anti-PLC $\beta$ 3 showing nuclear localization of the protein. Hoechst33342 staining indicates the nucleus. Scale bars, 10  $\mu$ m. (b) Control and ORP4L knockdown Jurkat T-cells were treated for 5 min in the presence or absence of 10  $\mu$ g/mL anti-CD3. The total (T), plasma membrane (P), cytosolic (C) and nuclear (N) fractions were analyzed by western blot. Pan-cadherin, histone H2A and actin were used as loading controls for the plasma membrane, nuclear and cytosolic fractions, respectively. (c) Jurkat T-cells were treated for 5 min in the presence or absence of 10  $\mu$ g/mL anti-CD3, and then cells were cross-linked by 1mM DSP for 30 min before lysis. The plasma membrane (P) and cytosolic (C) fractions were analyzed by western blot. (d) PLC $\beta$ 3 translocation in control and ORP4L knockdown Jurkat T-cells upon 10  $\mu$ g/mL anti-CD3 stimulation for 5 min (upper, left). The percentage of cells responding to anti-CD3 is represented as a histogram (upper, right) (100 cells from three experiments with 10 random fields/experiment). A line intensity profile across the cell was obtained in a given image (upper, left). Representative intensity profiles are shown (lower, left). The relative fluorescence intensity ratio of plasma-membrane-adjacent area ( $I_{pm}$ ) versus nuclear area ( $I_{nu}$ ) are shown (lower, right; 50 cells from three experiments with 10 random fields/experiment). (e) PLC $\beta$ 3 translocation in shNT or shORP4L lentivirus-infected Jurkat T-cells and shORP4L -infected cells re-transfected with ORP4L. Cells were stimulated for 5 min in the presence or absence of 10  $\mu$ g/mL anti-CD3. The percentage of cells responding to anti-CD3 (100 cells from three experiments with 10 random fields/experiment) and the relative fluorescence intensity ratio of plasma-membrane-adjacent area ( $I_{pm}$ ) versus nuclear area ( $I_{nu}$ ) are shown (50 cells from three experiments with 10 random fields/experiment). Scale bars, 10  $\mu$ m. (f) Confocal microscopy analysis of PLC $\beta$ 3 (green) and p-PLC $\beta$ 3 (red) localization in Jurkat T-cells. Cells were stimulated for 5 min in the presence or absence of 10  $\mu$ g/mL anti-CD3. Scale bars, 10  $\mu$ m. The data represent mean  $\pm$  S.D. from an experiment performed in triplicate. \*\*p < 0.01, \*\*\*p < 0.001, Student's t test.

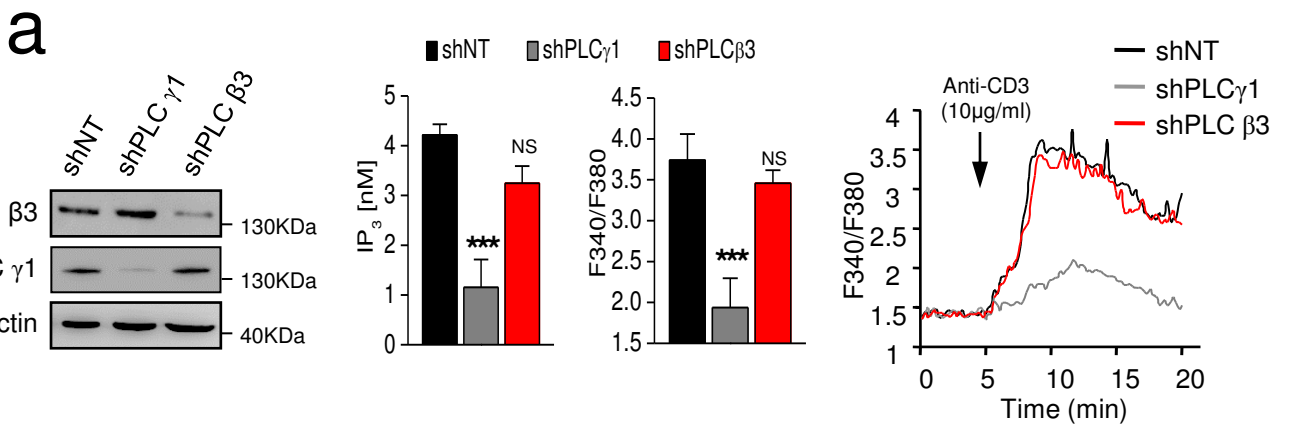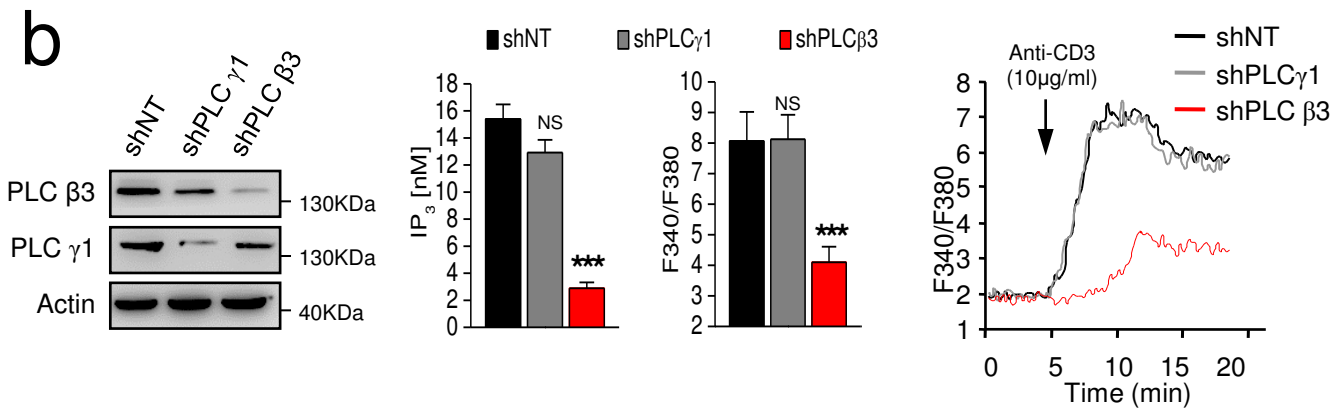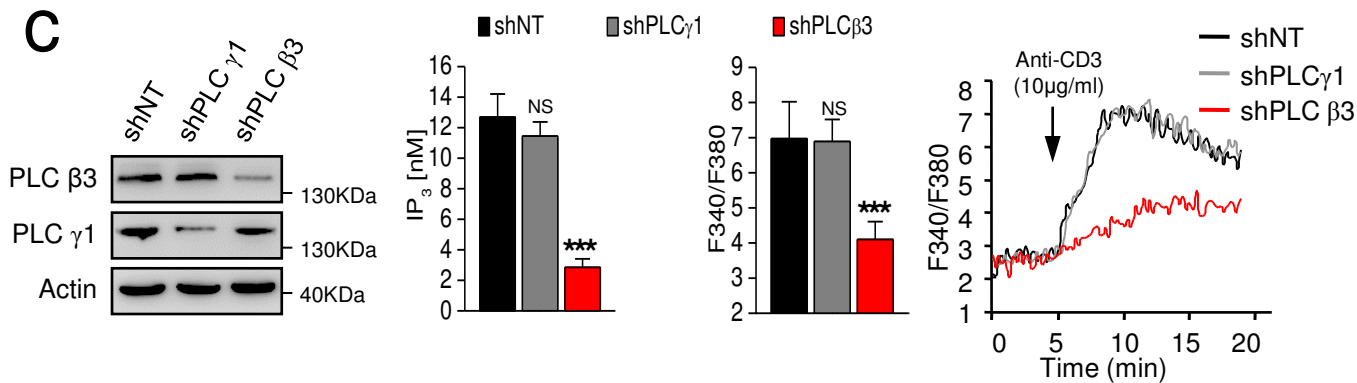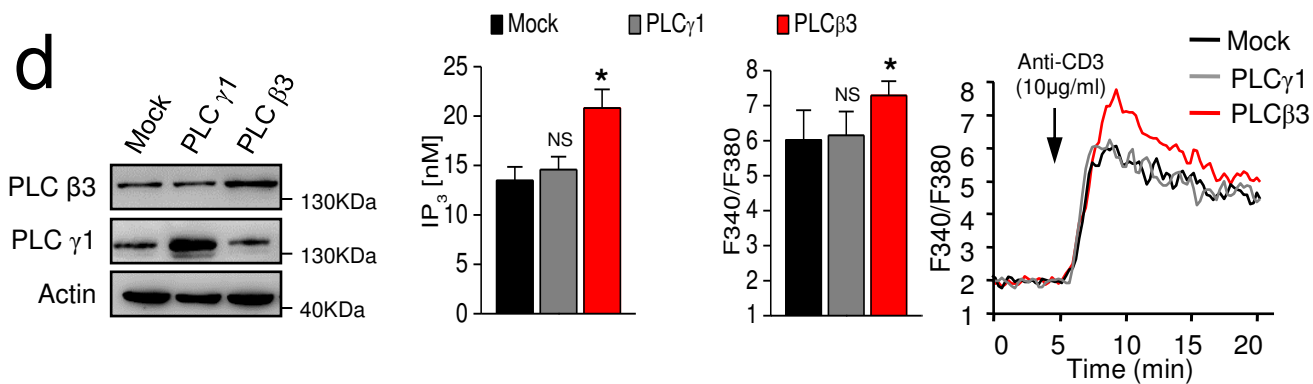

**Supplementary Figure 5. PLC $\beta$ 3 is essential for Ca $^{2+}$  release in T-ALL cells.**

Measurement of anti-CD3 induced IP $_3$  production and [Ca $^{2+}$ ] $_i$  transients upon PLC $\beta$ 3 or PLC $\gamma$ 1 knockdown in (a) normal T-cells, (b) primary T-ALL cells, and (c) Jurkat T-cells. (d) Measurement of anti-CD3 induced IP $_3$  production and [Ca $^{2+}$ ] $_i$  transients upon PLC $\beta$ 3 or PLC $\gamma$ 1 overexpression in Jurkat T-cells. IP $_3$  concentration was determined by stimulation of cells with 10  $\mu$ g/mL anti-CD3 for 5 min. [Ca $^{2+}$ ] $_i$  were recorded as F340/380 ratio using Fura2-AM in cells with 10  $\mu$ g/mL of anti-CD3 stimulation. Average [Ca $^{2+}$ ] $_i$  responses and quantification of [Ca $^{2+}$ ] $_i$  peak amplitudes of normal T-cells or primary T-ALL cells are shown. For the Jurkat T-cells the data represent mean  $\pm$  S.D. value from an experiment performed in triplicate, and for primary T-cells and T-ALL cells mean  $\pm$  S.D. value of n=3 primary T-ALL specimens. \*p< 0.05, \*\*\*p < 0.001, NS, not significant, Student's t test.

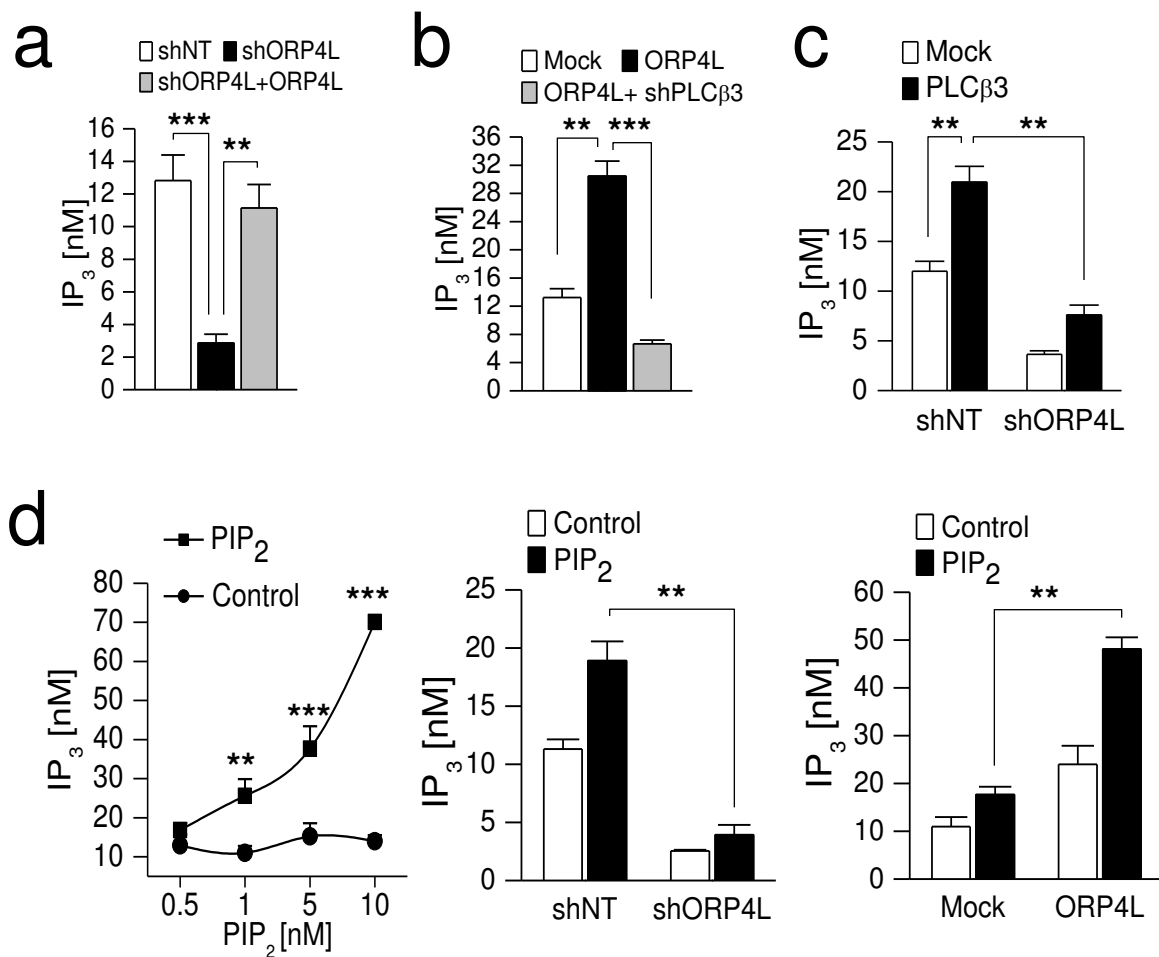

**Supplementary Figure 6. ORP4L modulates IP<sub>3</sub> production.** (a) IP<sub>3</sub> production in shNT or shORP4L transduced Jurkat T-cells and shORP4L transduced cells re-transfected with ORP4L. (b) IP<sub>3</sub> production in Jurkat T-cells overexpressing ORP4L alone or in combination with shPLCβ3. (c) IP<sub>3</sub> production in shNT or shORP4L transduced Jurkat T-cells with or without PLCβ3 overexpression. (d) IP<sub>3</sub> production in wild-type Jurkat T-cells incubated with increasing concentrations of exogenous PIP<sub>2</sub> (left), and ORP4L knockdown (middle) or ORP4L overexpressing (right) cells after treatment with 1 nM PIP<sub>2</sub>. Cells were incubated with PIP<sub>2</sub> for 1 h before 5 min stimulation with 10 μg/mL anti-CD3. The data represent mean ± S.D. value from an experiment performed in triplicate. \*\*p < 0.01, \*\*\*p < 0.001, Student's t test.



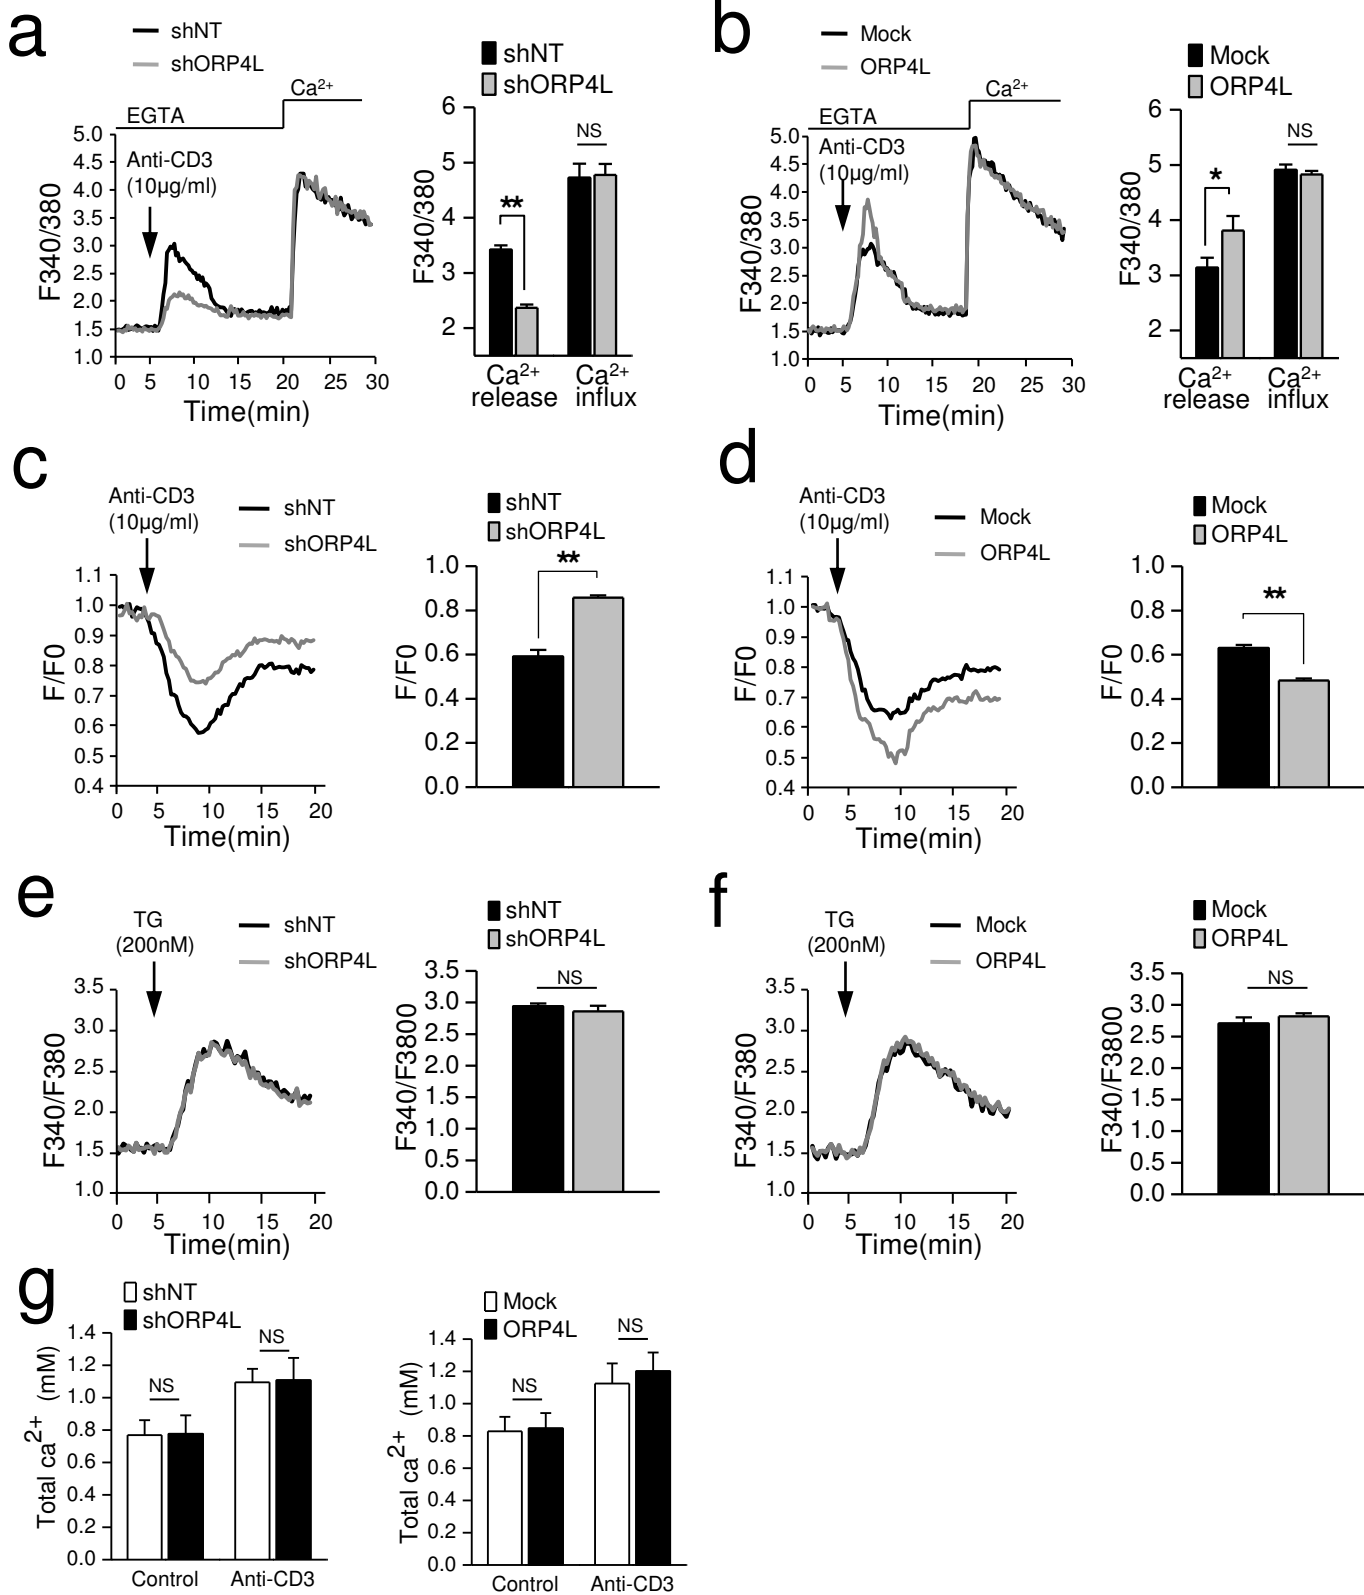

**Supplementary Figure 7. ORP4L regulates Ca<sup>2+</sup> release from ER in Jurkat T-cells.** (a, b) Jurkat T-cells subjected to ORP4L knockdown (a) or overexpression (b) were stimulated with 10 µg/mL anti-CD3 in ECB (containing 10 mM EGTA) without Ca<sup>2+</sup>. Changes in [Ca<sup>2+</sup>]<sub>i</sub> were recorded as the F340/380 ratio using Fura2-AM. After stimulation, ECB containing 2 mM CaCl<sub>2</sub> instead of EGTA were used to analyze Ca<sup>2+</sup> influx. Average [Ca<sup>2+</sup>]<sub>i</sub> responses and quantification of [Ca<sup>2+</sup>]<sub>i</sub> peak amplitudes are shown. (c, d) Jurkat T-cells subjected to ORP4L knockdown (c) or overexpression (d) were stimulated with 10 µg/mL anti-CD3 in ECB. Changes in [Ca<sup>2+</sup>]<sub>i</sub> were recorded as the F/F<sub>0</sub> ratio using Fluo5N-AM. Average [Ca<sup>2+</sup>]<sub>E</sub> responses and quantification of [Ca<sup>2+</sup>]<sub>E</sub> peak amplitudes are shown. (e, f) Jurkat T-cells subjected to ORP4L knockdown (e) or overexpression (f) were stimulated 100 nM TG in ECB. Changes in [Ca<sup>2+</sup>]<sub>i</sub> were recorded as the F340/380 ratio using Fura2-AM. (g) Total amount of Ca<sup>2+</sup> in Jurkat T-cells subjected to ORP4L knockdown and overexpression in the presence or absence of 10 µg/mL anti-CD3 stimulation. The data represent mean ± S.D. value from an experiment performed in triplicate. \*p < 0.05, \*\*p < 0.01, NS, not significant, Student's t test.

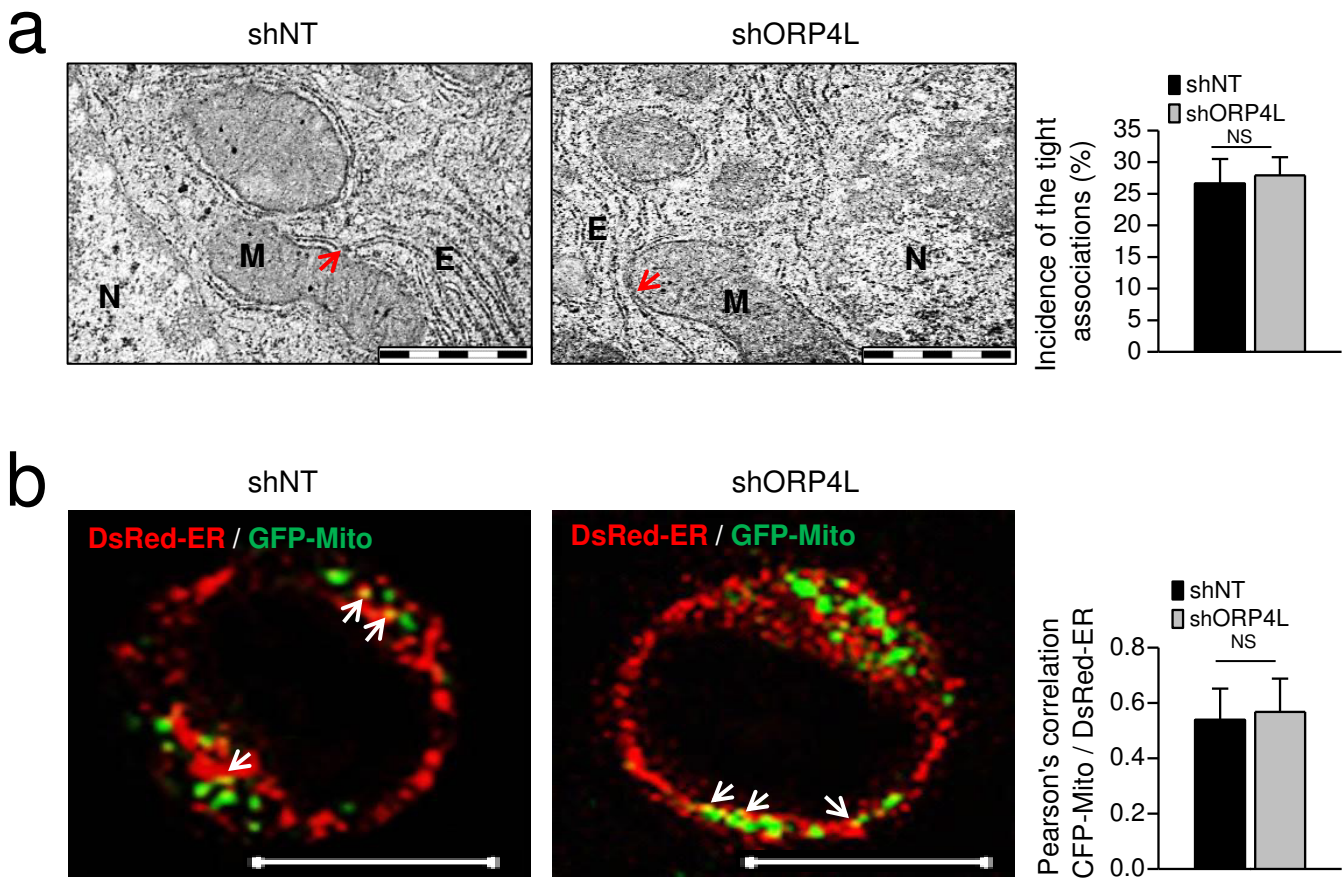

**Supplementary Figure 8. ORP4L knockdown failed to change the quantity of ER-mitochondrial contacts in Jurkat T-cells.** (a) TEM imaging of ER-mitochondrial contact sites (red arrowheads depicting the close contacts) in control and ORP4L knockdown Jurkat T-cells, and measurements of the ER-mitochondria interface (N, nucleus; M, mitochondrion; E, endoplasmic reticulum), Scale bars, 200 nm. (b) Confocal microscopy analysis of the colocalization of ER (red) and mitochondria (green). Scale bars, 10  $\mu$ m. Pearson's correlation of the ER and mitochondrial signals is represented (35–40 cells were analyzed per condition). The data represent mean  $\pm$  S.D. value from an experiment performed in triplicate. NS, not significant, Student's t test.

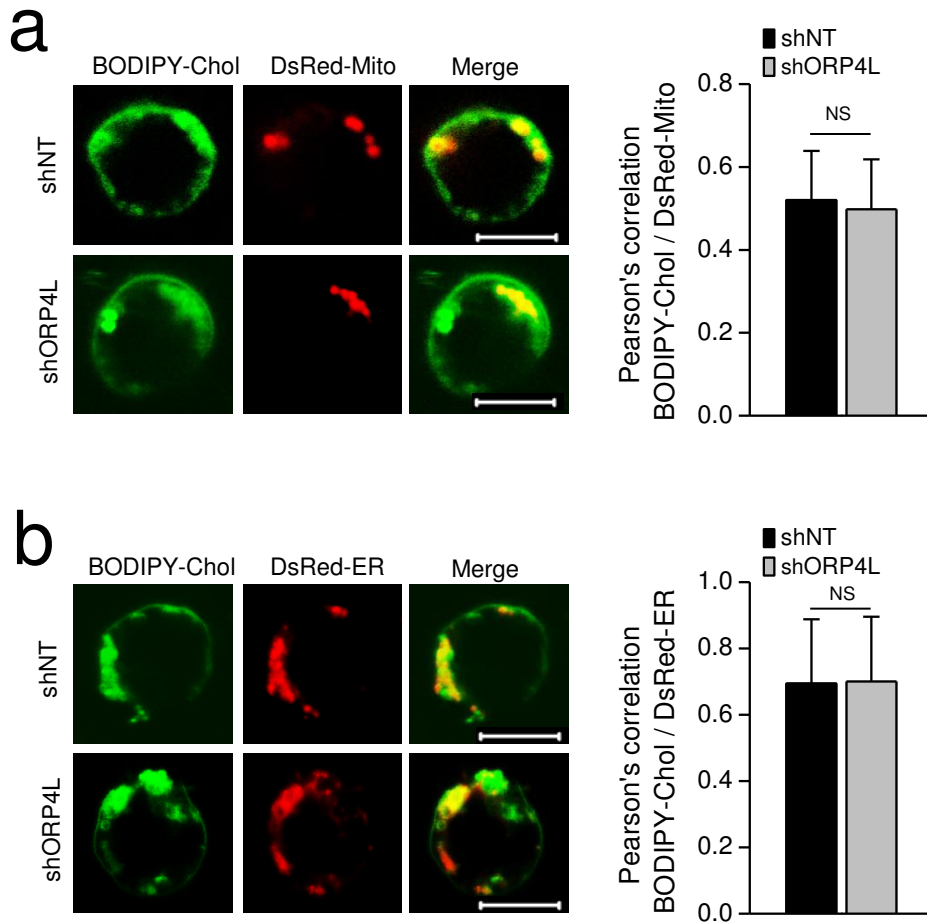

**Supplementary Figure 9. ORP4L knockdown does not change the transport of BODIPY-cholesterol from the PM to ER or mitochondria.** Control and ORP4L knockdown Jurkat T-cells were transfected with mitochondrial (DsRed-Mito) (a) or ER (DsRed-ER) marker (b) for 24 h. The cells were then labeled for 10 min with BODIPY-chol, chased for 60 min, and confocal images were taken after the chase. Scale bars, 10  $\mu$ m. Bars indicate Pearson's correlation of BODIPY-chol and each organelle DsRed marker (35–40 cells were analyzed per condition). The data represent mean  $\pm$  S.D. value from an experiment performed in triplicate. NS, not significant, Student's t test.

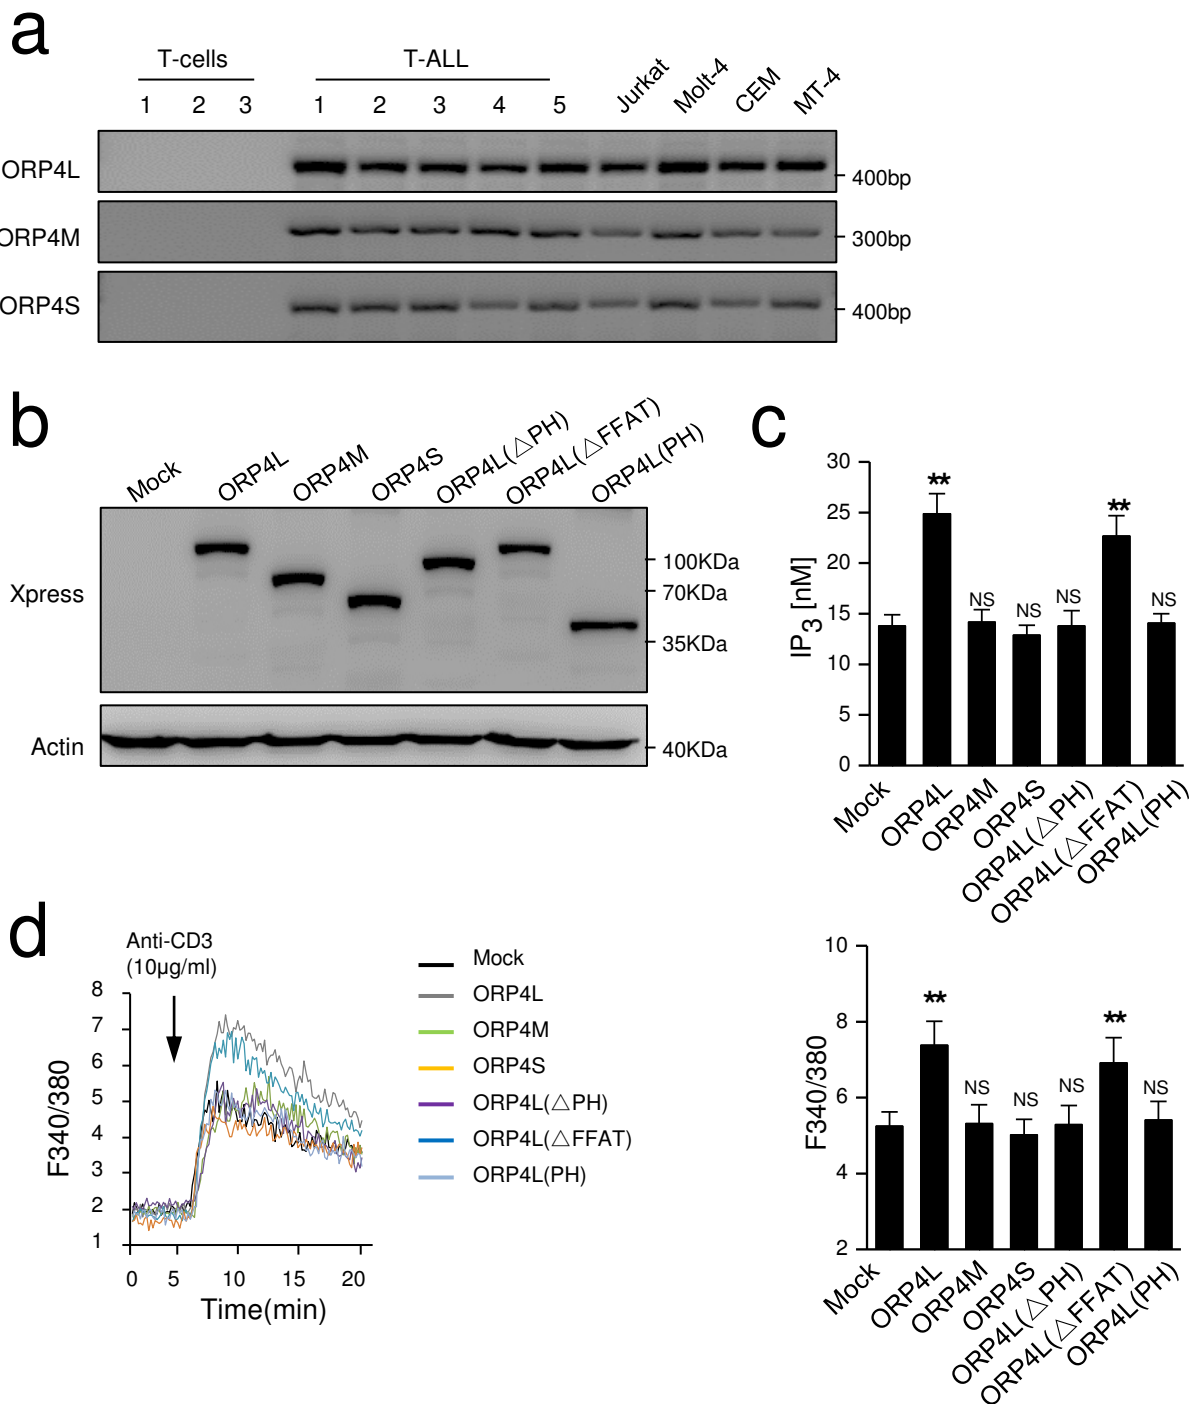

**Supplementary Figure 10. The effects of ORP4M, ORP4S and truncated or mutated ORP4L constructs on Ca<sup>2+</sup> signaling.** (a) RT-PCR analysis of ORP4L, ORP4M and ORP4S expression in normal T-cells, primary T-ALL cells and T-ALL cell lines. (b) Western blot verifying overexpression of the constructs used in Jurkat T-cells, as detected by Xpress epitope tag antibody. (c, d) IP<sub>3</sub> production (c) and Ca<sup>2+</sup> response (d) upon anti-CD3 stimulation in Jurkat T-cells overexpressing the indicated constructs. The data represent mean  $\pm$  S.D. value from an experiment performed in triplicate. \*\*p < 0.01, NS, not significant, Student's t test.

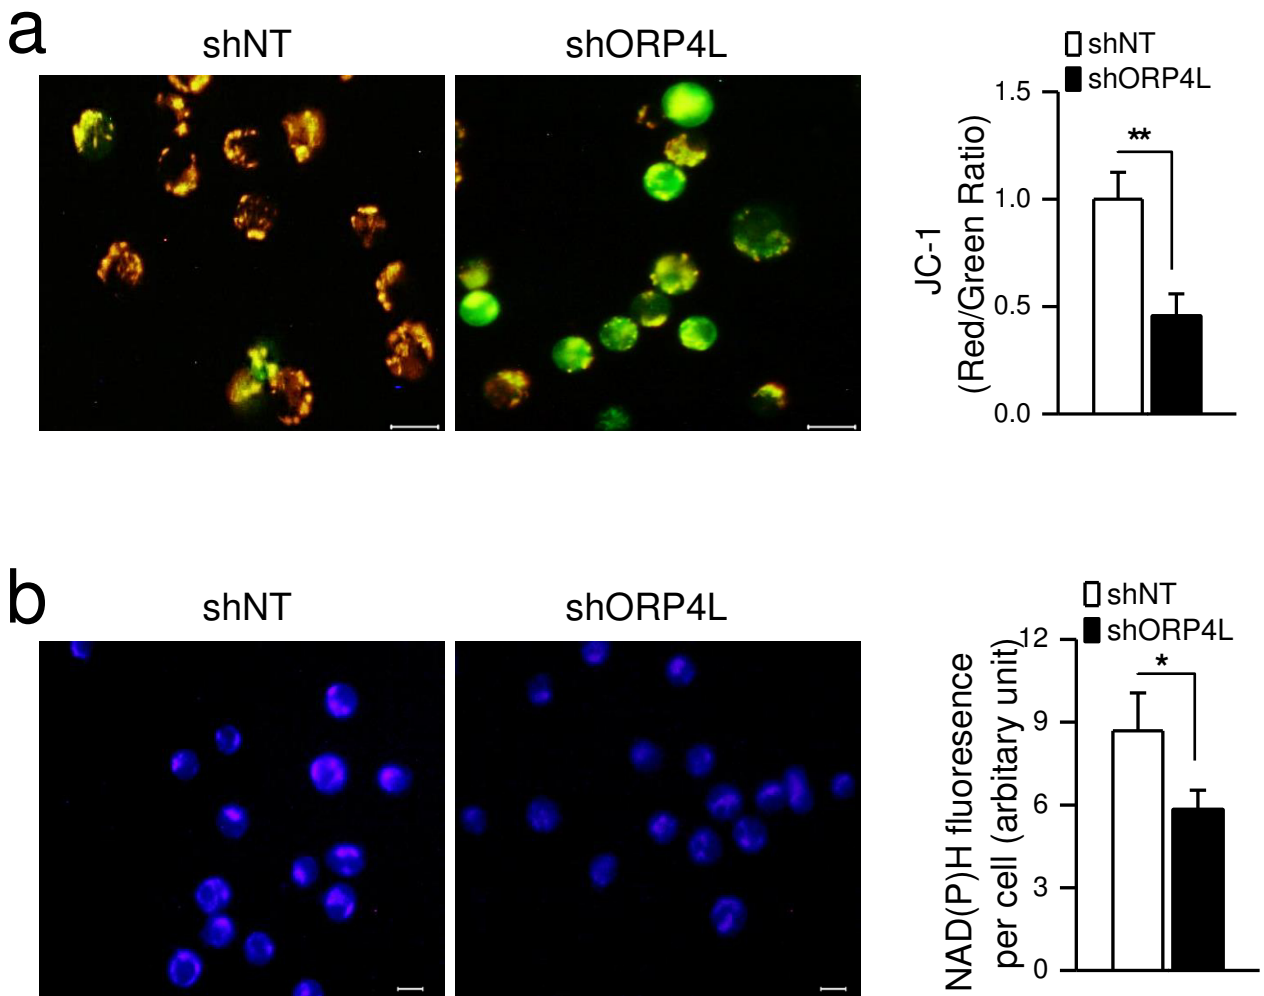

**Supplementary Figure 11. ORP4L knockdown reduces the mitochondrial membrane potential and NAD(P)H autofluorescence in Jurkat T-cells.** (a) Mitochondrial membrane potential was visualized with epifluorescence microscopy and expressed as ratio of JC-1 aggregates (red) and monomer (green) (Red/Green). (b) NAD(P)H autofluorescence was captured with DAPI cube by epifluorescence microscopy and used to calculate FCCP-sensitive mitochondrial NAD(P)H level [ $\Delta$ NAD(P)H] per cell. Scale bars, 10  $\mu$ m. The data represent mean  $\pm$  S.D. (n=3). \*p < 0.05, \*\*p < 0.001, Student's t test.

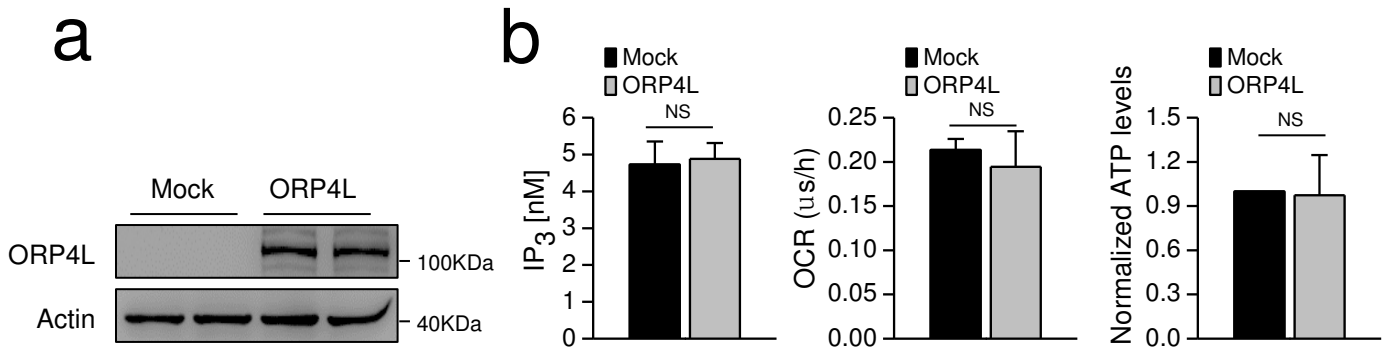

**Supplementary Figure 12. ORP4L overexpression failed to affect oxidative phosphorylation in normal T-cells. (a)** Western blot verifying the overexpression of ORP4L in transfected T-cells. **(b)** IP<sub>3</sub> production (left), OCR (middle) and ATP levels (right) in control and ORP4L overexpressing T-cells. The data represent mean  $\pm$  S.D. value from an experiment performed in triplicate. NS, not significant, Student's t test.

Fig. 1f

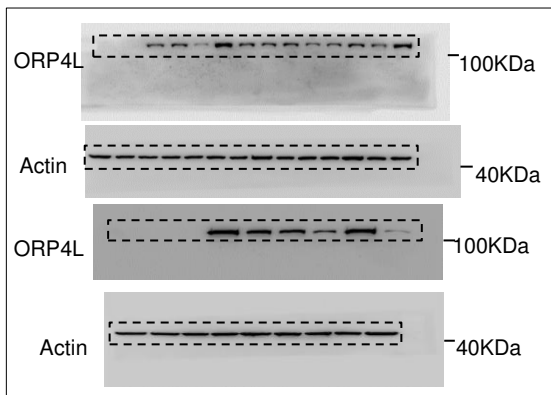

Fig. 1g

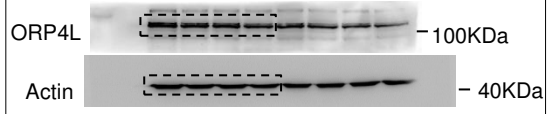

Fig. 2b

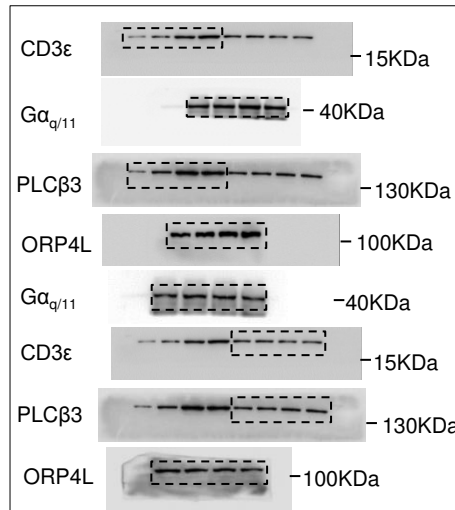

Fig. 2c

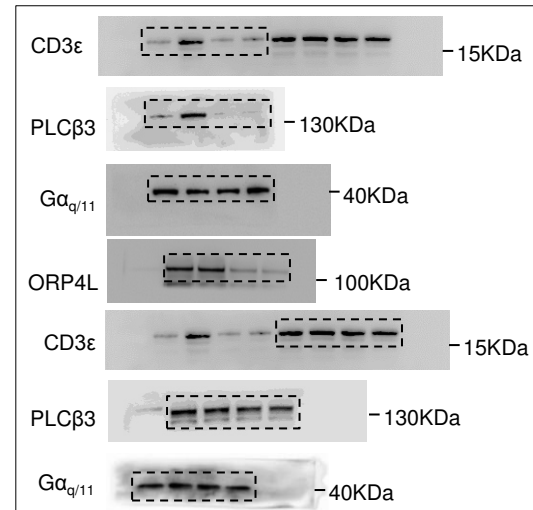

Fig. 2d

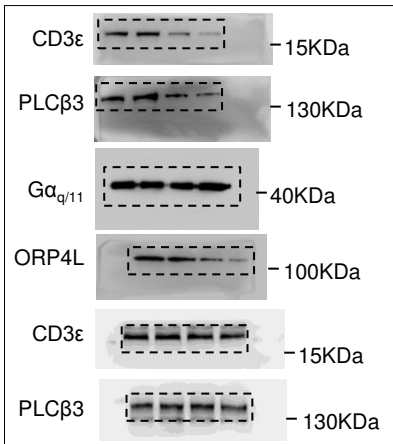

Fig. 2e

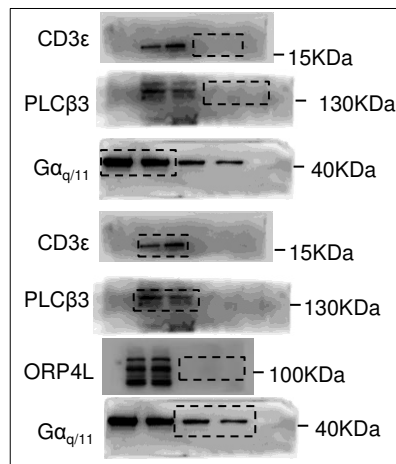

Fig. 3b

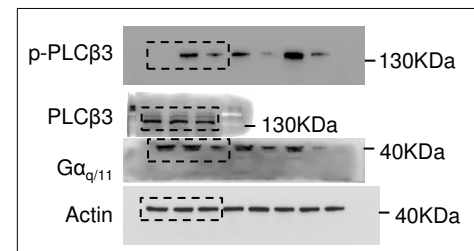

Fig. 3c

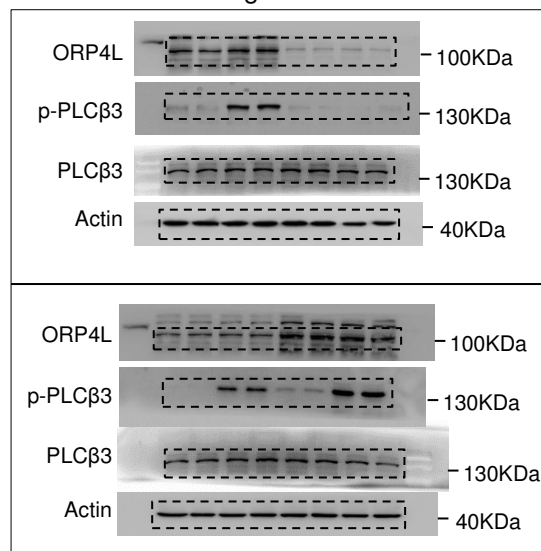

Fig. 3d

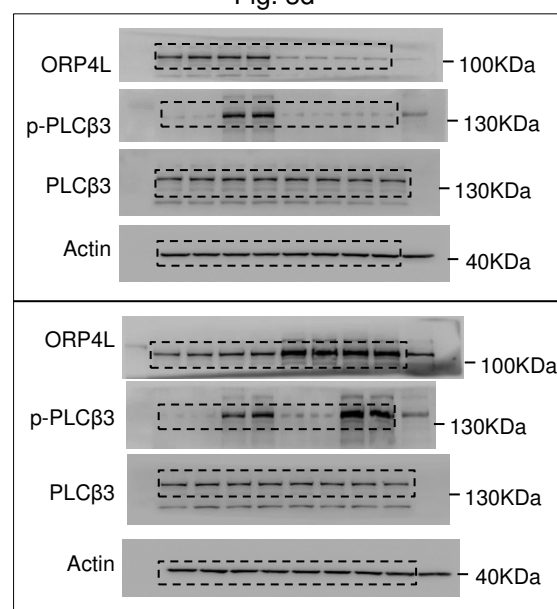

**Supplementary Figure 13. Representative original images of immunoblotting results for Figure 1-6. The cropped areas used in the figures are marked by boxes.**



Fig. 5a

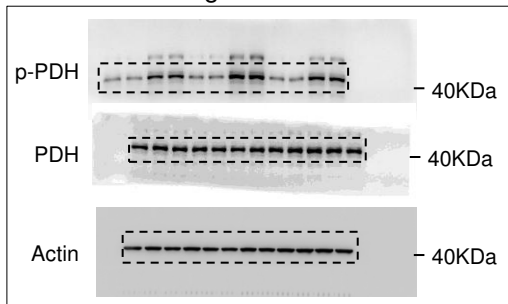

Fig. 5b

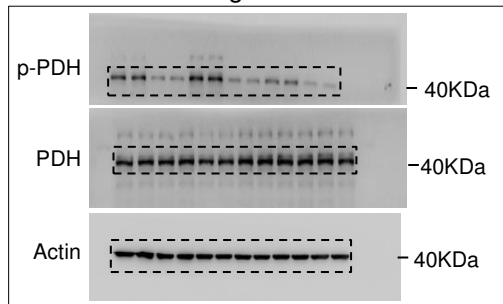

Fig. 5c

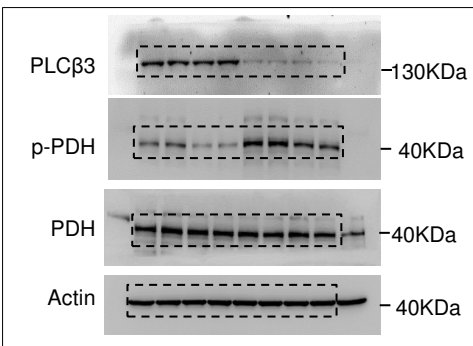

Fig. 5d

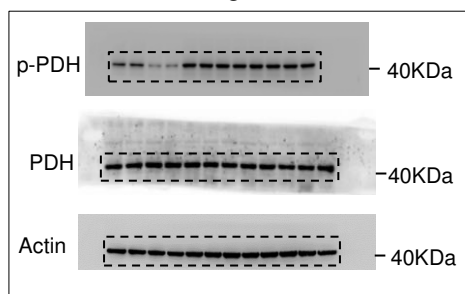

Fig. 5e

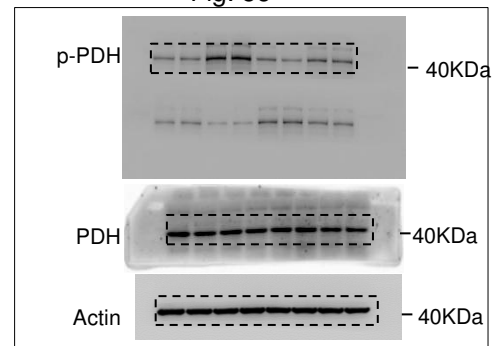

Fig. 5f

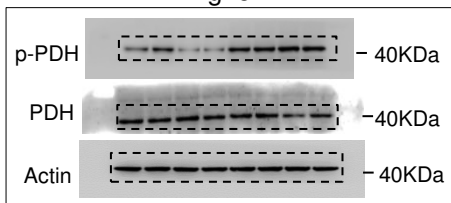

Fig. 5g

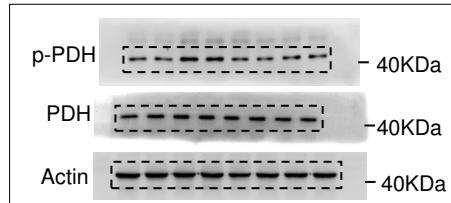

Fig. 5h

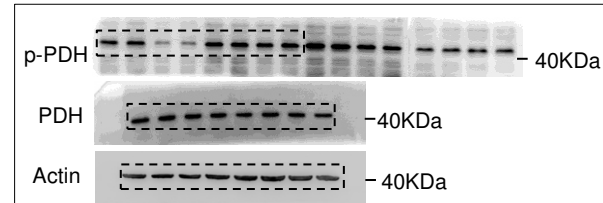

Fig. 6e

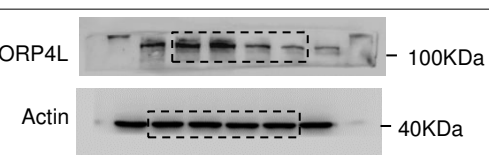

Fig. 6g

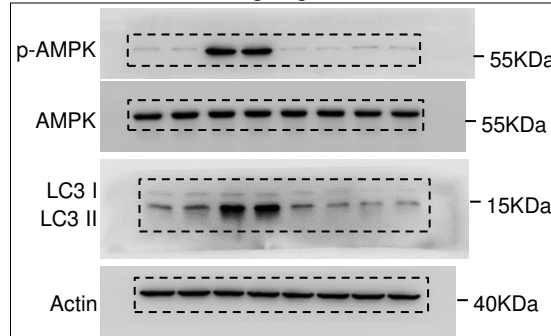

Fig. 6f

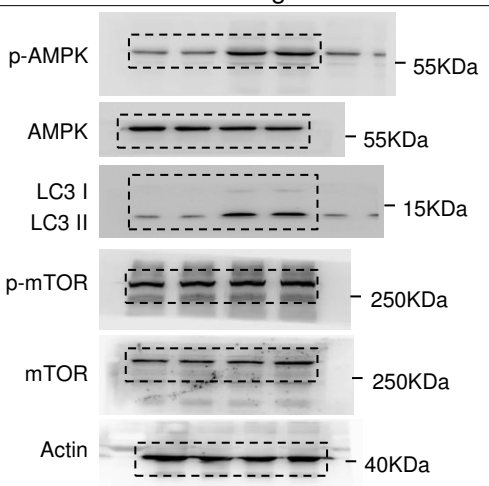

Fig. 6i

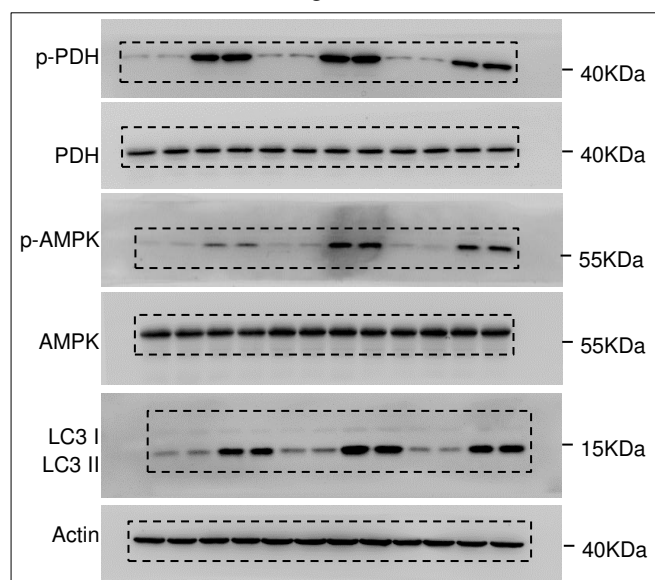

Fig. 6h

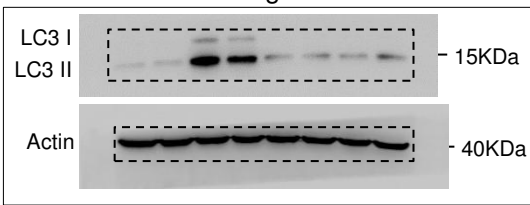

**Supplementary Table 1. Summary of the clinical T-ALL cell samples and their analyses**

| Samples  | Age | Sex | Analyses performed |     |      |       |              |                 |                  |               |            |             |     |                              |
|----------|-----|-----|--------------------|-----|------|-------|--------------|-----------------|------------------|---------------|------------|-------------|-----|------------------------------|
|          |     |     | ATP                | OCR | ECAR | q-PCR | Western blot | IP <sub>3</sub> | Ca <sup>2+</sup> | Cofocal image | Cell death | Engraftment | ROS | PDH/AMPK activity, autophagy |
| T-ALL 1  | 36  | M   | Yes                | Yes | Yes  | Yes   | Yes          | Yes             | Yes              | Yes           |            | Yes         | Yes | Yes                          |
| T-ALL 2  | 21  | F   | Yes                | Yes | Yes  | Yes   | Yes          | Yes             | Yes              | Yes           | Yes        | Yes         | Yes | Yes                          |
| T-ALL 3  | 48  | M   | Yes                | Yes | Yes  | Yes   | Yes          | Yes             | Yes              | Yes           |            | Yes         | Yes | Yes                          |
| T-ALL 4  | 55  | M   |                    |     |      | Yes   | Yes          |                 |                  |               |            | Yes         |     |                              |
| T-ALL 5  | 20  | F   | Yes                |     |      | Yes   | Yes          |                 |                  |               |            | Yes         |     |                              |
| T-ALL 6  | 28  | F   | Yes                | Yes | Yes  | Yes   | Yes          |                 |                  |               |            | Yes         |     |                              |
| T-ALL 7  | 61  | M   |                    |     |      | Yes   | Yes          |                 |                  |               |            |             |     |                              |
| T-ALL 8  | 37  | M   | Yes                |     |      | Yes   | Yes          |                 |                  |               |            | Yes         |     |                              |
| T-ALL 9  | 33  | F   |                    |     |      | Yes   | Yes          |                 |                  |               |            |             |     |                              |
| T-ALL 10 | 19  | M   |                    |     |      | Yes   | Yes          |                 |                  |               |            |             |     |                              |
| T-ALL 11 | 44  | M   |                    |     |      | Yes   | Yes          |                 |                  |               |            |             |     |                              |
| T-ALL 12 | 28  | F   |                    |     |      | Yes   | Yes          |                 |                  |               |            |             |     |                              |
| T-ALL 13 | 38  | M   |                    |     |      | Yes   | Yes          |                 |                  |               |            |             |     |                              |
| T-ALL 14 | 24  | F   | Yes                | Yes | Yes  | Yes   | Yes          |                 |                  |               |            | Yes         |     |                              |
| T-ALL 15 | 39  | F   |                    |     |      | Yes   | Yes          |                 |                  |               |            |             |     |                              |
| T-ALL 16 | 18  | F   |                    |     |      | Yes   | Yes          |                 |                  |               |            | Yes         |     |                              |
| T-ALL 17 | 40  | M   | Yes                | Yes | Yes  | Yes   | Yes          |                 |                  |               |            | Yes         |     |                              |
| T-ALL 18 | 33  | M   |                    |     |      | Yes   | Yes          |                 |                  |               |            |             |     |                              |

**Supplementary Table 2. Putative ORP4L-interacting proteins**

| <b>Symbol</b>                 | <b>Entrez Gene Name</b>                                               |
|-------------------------------|-----------------------------------------------------------------------|
| HCLS1                         | Hematopoietic lineage cell-specific protein                           |
| DARS                          | Aspartyl-tRNA synthetase                                              |
| A1S9T                         | Ubiquitin-like modifier-activating enzyme 1                           |
| <b>CD3E</b>                   | <b>T-cell surface glycoprotein CD3 epsilon chain</b>                  |
| RPL27                         | 60S ribosomal protein L27                                             |
| JUP                           | Putative uncharacterized protein ENSP00000382160                      |
| CGI-55                        | PAI1 RNA-binding protein 1                                            |
| <b>PLC<math>\beta</math>3</b> | <b>phosphatidylinositol-4,5-bisphosphate phosphodiesterase beta-3</b> |
| FUBP2                         | Far upstream element-binding protein 2                                |
| EVL                           | Ena/vasodilator-stimulated phosphoprotein-like                        |
| RABEP2                        | Rab GTPase-binding effector protein 2                                 |
| <b>Gaq/11</b>                 | <b>Guanine nucleotide binding protein, alpha q/11</b>                 |
| NUDC                          | Nuclear distribution protein C homolog                                |
| DRBF                          | Double-stranded RNA-binding protein 76                                |

**Supplementary Table 3. The targeted shRNA sequences used**

| Construct        | sense 5'- 3'              | Anti-sense 5'- 3'        |
|------------------|---------------------------|--------------------------|
| shNT             | GCATTGGTCGTCTCT ATTA      | TAATAGAGACGACCAATGC      |
| shORP4L          | TCAGAGTCAAGCTCAGGTGTA     | TACACCTGAGCTTGACTCTGA    |
| shPLC $\beta$ 3  | AGATGAGGGACAAGCATAAGAAGGA | TCCTTCTTATGCTTGTCCTCATCT |
| shPLC $\gamma$ 1 | AAACAACCGGCTCTT CGT       | ACGAAGAGCCGGTTGTTT       |
| siGq/11          | GGAGUACAAUCGGUCUAAUU      | UUAGACCAGAUUGUACUCCUU    |

**Supplementary Table 4. Oligonucleotide primers used for cDNA constructs**

| <b>Construct</b>                    | <b>Forward primer 5'- 3'</b>                                                                                                     | <b>Reverse primer 5'- 3'</b>                                                                                                             |
|-------------------------------------|----------------------------------------------------------------------------------------------------------------------------------|------------------------------------------------------------------------------------------------------------------------------------------|
| ORP4L-pcDNA4 HisMaxC                | ATTtctagaATGGGGAAAGCGGCGGT*                                                                                                      | ATTtctagaGTGGCGCTCAGAAGATGTTG<br>GGGCACATATGCCA                                                                                          |
| ORP4M-pcDNA4 HisMaxC                | ATTagatctATGTCGTCCTGGCAGCGAAG                                                                                                    | ATTgtcgacGAAGATGTTGGGGCACATATG                                                                                                           |
| ORP4S-pcDNA4 HisMaxC                | ATTagatctATGGAAGACTCCACATCCTTCA                                                                                                  | ATTgtcgacGAAGATGTTGGGGCACATATG                                                                                                           |
| ORP4L( $\Delta$ PH)-pcDNA4HisMaxC   | <b>Forward 1:</b><br>ATTagatctATGGGGAAAGCGGCGGCT<br><b>Forward 184:</b><br>GCTGTCCAGAGGCAGTAAGGCGTCCCCAGA<br>GTCATCTGAA          | <b>Reverse 916:</b><br>ATTgtcgacGAAGATGTTGGGGCACATATGCCA<br><b>Reverse 281:</b><br>TTCAGATGACTCTGGGGACGCCTTACTGCCTCT<br>GGACAGC          |
| ORP4L( $\Delta$ FFAT)-pcDNA4HisMaxC | <b>Forward 1:</b><br>ATTagatctATGGGGAAAGCGGCGGCT<br><b>Forward 450:</b><br>TGATGAAGGATGTGGAGTCTTCCATGGTATC<br>TTCATCTTCTCACTGTCC | <b>Reverse 916:</b><br>ATTgtcgacGAAGATGTTGGGGCACATATGCCA<br><b>Reverse 465:</b><br>GGACAGTGAGGAAGATGAAGATACATGGAAGA<br>CTCCACATCCTTCATCA |
| ORP4L(PH)-pcDNA4HisMaxC             | ATTagatctGTGAGGGCTGGCTTCTCAAGT                                                                                                   | ATTgtcgacCTTGGCCAGCTCCAGGGCGGTGAT                                                                                                        |
| PLC $\beta$ 3-pcDNA4HisMaxC         | ATTgaattcATGGCGGGCGCCAGCCCGGC                                                                                                    | ATTtctgagTCAGAGCTGCGTGTCTCCT                                                                                                             |
| PLC $\gamma$ 1-pcDNA4HisMaxC        | ATTgaattcATGGCGGGCGCCGCGTCCCCTT                                                                                                  | ATTtctagaCTAGAGGCGGTTGTCTCCATTGACC                                                                                                       |

\*Restriction sites are indicated in lower case letters.
